# Supplementary material for: Defining tumor resistance to PD-1 pathway blockade: recommendations from the first meeting of the SITC Immunotherapy Resistance Taskforce
Source: PubMed Central journal article supplement — J Immunother Cancer. 2020 Apr 1;8(1):e000398. doi: 10.1136/jitc-2019-000398 (PMC7174063; doi:10.1136/jitc-2019-000398), 2020-04-01
Supplement: jitc-2019-000398supp001.pdf [file jitc-2019-000398supp001.pdf]

**Supplementary File 1: SITC Immunotherapy Resistance Workshop Attendees**

Ryan Sullivan, MD – *Massachusetts General Hospital*  
Harriet Kluger, MD – *Yale School of Medicine*  
Maria Ascierto, PhD – *AstraZeneca*  
Sanjeeve Balasubramaniam, MD – *U.S. Food and Drug Administration*  
Andrew Bernstein, MD, MPH – *AstraZeneca*  
Michaela Bowden, PhD, BSc – *Bristol-Myers Squibb*  
Margaret Callahan, MD, PhD – *Memorial Sloan Kettering Cancer Center*  
Edward Cha, MD, PhD – *Genentech, Inc.*  
Helen Chen, MD – *National Cancer Institute*  
Victoria Chiou, MD – *U.S. Food and Drug Administration*  
Charles Drake, MD, PhD – *Columbia University Medical Center*  
David Feltquake, MD, PhD – *Bristol-Myers Squibb*  
Robert Ferris, MD, PhD – *UPMC Hillman Cancer Center*  
James Gulley, MD, PhD, FACP – *National Cancer Institute*  
Shilpa Gupta, MD – *University of Minnesota*  
Priti Hegde, PhD – *Genentech, Inc.*  
Rachel Humphrey – *CytomX Therapeutics*  
Patricia Keegan, MD – *U.S. Food and Drug Administration*  
Theresa LaVallee, PhD – *Parker Institute for Cancer Immunotherapy*  
Dung Le, MD – *Johns Hopkins University*  
Vanessa Lucey, PhD, MBA – *Cancer Research Institute*  
Vassiliki Papadimitrakopoulou, MD – *MD Anderson Medical Center*  
Michael Postow, MD – *Memorial Sloan Kettering Cancer Center*  
Eric Rubin, MD – *Merck*  
Elad Sharon, MD, MPH – *National Cancer Institute*  
Harpreet Singh, MD – *U.S. Food and Drug Administration*  
Mario Sznol, MD – *SITC President; Yale School of Medicine*  
Janis Taube, MD, MSC – *Johns Hopkins School of Medicine*  
Hussein Tawbi, MD, PhD – *MD Anderson Medical Center*  
Marc Theoret, MD – *U.S. Food and Drug Administration*  
Suzanne Topalian, MD – *Johns Hopkins University School of Medicine*  
Ashley Ward, MD – *U.S. Food and Drug Administration*  
Roberta Zappasodi, PhD – *Memorial Sloan Kettering Cancer Center*
